# Supplementary material for: A dataset of housing market and self-attitudes towards housing location choices in Alexandria, Egypt
Source: PubMed Central journal article supplement (PMC5357685; doi:10.1016/j.dib.2017.02.052), 2017-03-09
Supplement: mmc4.pdf [file mmc4.pdf]

9. HOW LONG DOES IT TAKES YOU TO GO TO WORK ?

- Less than 30 min
- Between 30-60 min
- Between 61-59 min
- 90 min, or more
- I work outside Alexandria

10. WHICH MAIN MODE OF TRANSPORTION DO YOU USE TO GO TO WORK ?

- Walking
- My Private Car
- Bus or Micro-bus
- Train or Tram line
- Taxi
- Ride in a friend's car
- Transport facility offered by the company

11. HAVE YOU CHANGED YOUR HOUSE BEFORE?

- YES
- NO

IF **YES**, when was the last time you moved ?

- Less than two years
- From 2 to 10 years
- More than 10 years

The main reason to move was:  Unit type /or Neighborhood  tenure type  Transports  Others

12. DO YOU, OR YOUR HOUSEHOLD MEMBERS OWN ANOTHER HOUSING UNIT ?

- No
- YES , How many? .... which it is / they are now:  Vacant  Occupied

### **PART III: HOUSING DEMAND CHARACTERISTICS**

13. ARE YOU, OR ONE OF YOUR HOUSEHOLD'S MEMBERS SEARCHING FOR A NEW HOUSE?

- Yes
- No

14. IN WHICH DISTRICT WOULD YOU PREFER TO LIVE?

- Same neighborhood
- New Borg El Arab
- Other old districts in Alexandria
- Outside Alexandria, Specify...

15. THE MAIN REASONS TO CHOOSE A NEW LOCATION ARE.... ( **Please select the most 3 relevant factors**)

- Reasonable price
- Proximity to transportation
- Proximity to work
- Proximity to social relations and relatives
- Quiet neighborhood
- Social standing of the area
- Services and utilities
- Security and Safety

16. WHICH TENURE TYPE WOULD YOU PREFER?

- Ownership
- Long-Term Rent
- Short-Term Rent
